# Supplementary material for: Fruit Beer with the Bisucciu Sardinian Apricot Cultivar (Prunus armeniaca L.): A Technological and Analytical Approach
Source: MDPI journal article supplement (doi:10.3390/fermentation9030305), 2023-03-21
Supplement: s1 [file s1]

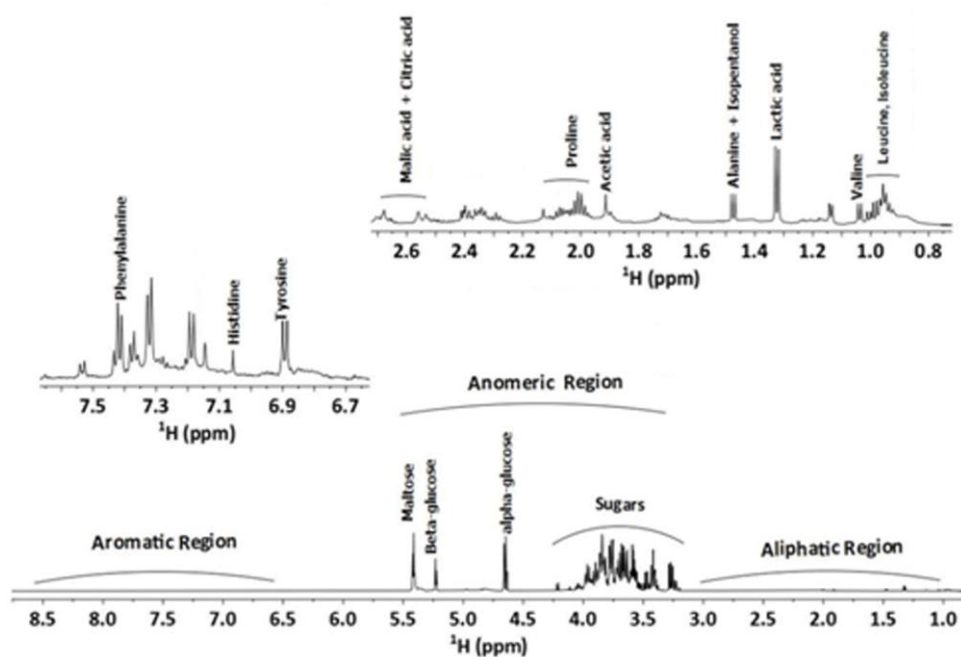

Figure S1:  $^1\text{H}$  NMR assignment of metabolites in beer wort.

Table S1: List of the metabolites identified by  $^1\text{H}$  NMR analysis in beer wort.

| Compound              | Assignment                      | $\delta$ $^1\text{H}$ ppm (multiplicity) |
|-----------------------|---------------------------------|------------------------------------------|
| Leucine               | $\delta$ -CH <sub>3</sub>       | 0.97 (d)                                 |
| Isoleucine            | $\delta$ -CH <sub>3</sub>       | 0.94 (t)                                 |
| Valine                | $\gamma$ -CH <sub>3</sub>       | 1.05 (d)                                 |
| Lactic acid           | CH <sub>3</sub>                 | 1.33 (d)                                 |
| Alanine + Isopentanol | CH <sub>3</sub>                 | 1.48 (d)                                 |
| Acetic acid           | CH <sub>3</sub>                 | 1.92 (s)                                 |
| Proline               | 4- CH <sub>2</sub>              | 1.96-2.11 (m)                            |
| Pyruvic acid          | CH <sub>3</sub>                 | 2.35 (s)                                 |
| GABA                  | $\alpha$ -CH                    | 2.39 (t)                                 |
| Malic + Citric acid   | $\frac{1}{2}$ - CH <sub>2</sub> | 2.56-2.70 (dd)                           |
| Choline               | CH <sub>3</sub>                 | 3.21 (s)                                 |
| Glycine               | CH <sub>2</sub>                 | 3.56 (s)                                 |
| Glucose               | CH <sub>2</sub>                 | 5.24 (d)                                 |
|                       | CH <sub>2</sub>                 | 4.66 (d)                                 |
| Dextrins              | -C1H                            | 4.64 (d)                                 |
| Maltose               | C1H                             | 5.41 (d)                                 |
| Fumaric acid          | CH                              | 6.52 (s)                                 |
| Histidine             | 4'-CH                           | 7.09 (s)                                 |
| Tyrosine              | 3',5'-CH                        | 6.90 (d)                                 |
| Phenylalanine         | 3',5'-CH                        | 7.43 (t)                                 |
| Formic acid           | CH                              | 8.36 (s)                                 |
